# Supplementary material for: Synthesis, metal–insulator transition, and photoresponse characteristics of VO2 nanobeams via an oxygen inhibitor-assisted vapor transport method
Source: Royal Society of Chemistry journal article supplement (doi:10.1039/d2tc05295d), 2023-01-01
Supplement: d2tc05295d1.pdf [file d2tc05295d1.pdf]

## Supplementary Information

### Synthesis, metal-insulator transition and photoresponse characteristics of VO<sub>2</sub> nanobeams via an oxygen inhibitor-assisted vapor transport method

Xitao Guo<sup>1,†</sup>, Yupei Hu<sup>1</sup>, Xin Liu<sup>1</sup>, Zainab Zafar<sup>2</sup>, Weiping Zhou<sup>3</sup>, Xingyu Liu<sup>4</sup>, Lin Feng<sup>1</sup>, Jijun Zou<sup>1</sup>, Haiyan Nan<sup>4,†</sup>

<sup>1</sup>Jiangxi Engineering Province Engineering Research Center of New Energy Technology and Equipment, East China University of Technology, Nanchang 330013, China.

<sup>2</sup>Experimental Physics Division, National Centre for Physics, Islamabad 44000, Pakistan.

<sup>3</sup>School of Physics and Materials Science, Nanchang University, Nanchang 330031, China.

<sup>4</sup>Engineering Research Center of IoT Technology Applications (Ministry of Education), Department of Electronic Engineering, Jiangnan University, Wuxi 214122, China.

\*e-mail: xtguo@ecut.edu.cn (X. Guo) and jnanhaiyan@jiangnan.edu.cn (H. Nan)

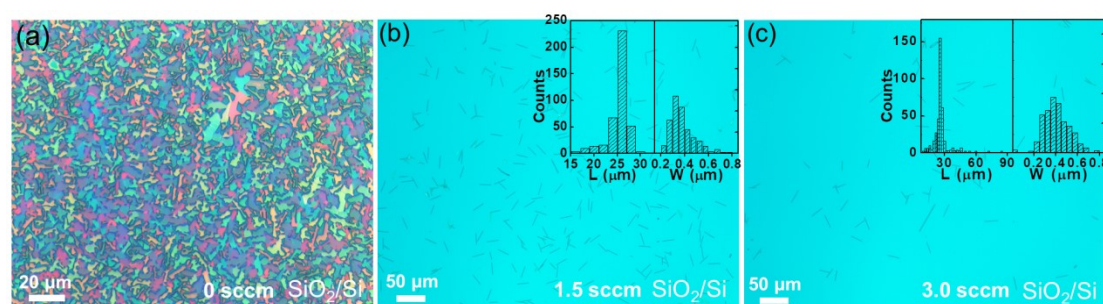

**Figure S1.** (a-c) The representative OM images of the as-grown VO<sub>2</sub> film and NBs structures observed over the entire substrate for the indicated growth conditions. Insets: the corresponding histograms of the length and width of the VO<sub>2</sub> NBs.

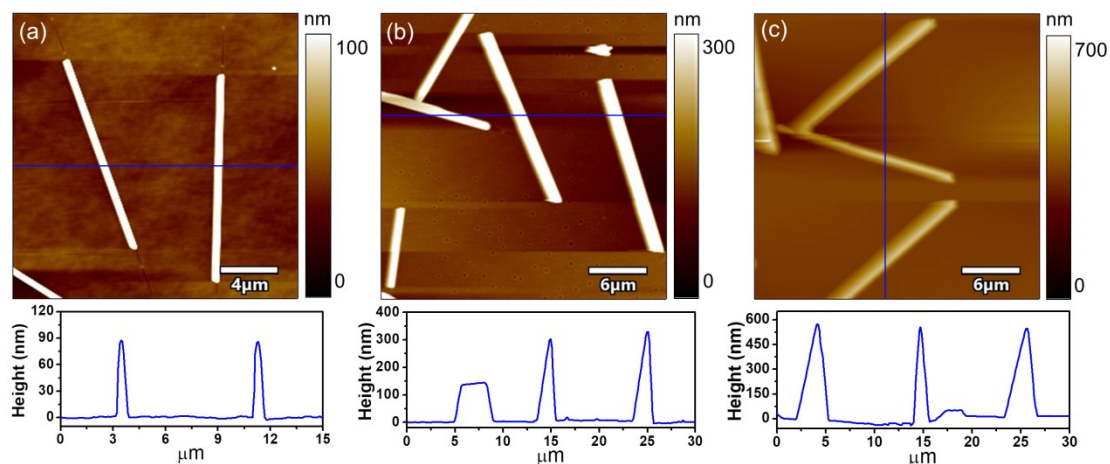

**Figure S2.** AFM images and the corresponding height profiles of VO<sub>2</sub> NBs on (a, b) SiO<sub>2</sub>/Si substrates, and (c) c-cut sapphire substrates. It can be seen that the thickness of VO<sub>2</sub> NBs on SiO<sub>2</sub>/Si substrate is from tens to hundreds of nanometers (roughly 80–350 nm), whereas the VO<sub>2</sub> NBs on sapphire substrate have relatively uniform shapes with thickness up to ~550 nm.

EDS has been used to analyze the elemental composition and distribution of the resulting VO<sub>2</sub> NBs in order to examine the impact of various oxygen levels on VO<sub>2</sub> stoichiometry. Figure S3(a–c) displays all the EDS spectral lines of NBs samples. The insets of Figure S3(a–c) show the relative weight ratio and atomic ratio of O/V in various NBs samples, respectively. As-grown VO<sub>2</sub> NBs have approximately the same stoichiometry due to a slight variation in the O/V atomic ratio, which was calculated to be 2.10, 2.13, and 2.19 under the proposed growth conditions. The most plausible explanation is that all NBs samples experienced prolonged high temperature annealing in step II (900 °C for 300 min, followed by a natural cooling to room temperature only in an argon gas environment). The uniform distribution of O and V elements in VO<sub>2</sub> NBs is demonstrated in Figure S3(d), which depicts a typical elemental mapping of VO<sub>2</sub> NBs at 0.5 sccm O<sub>2</sub>.

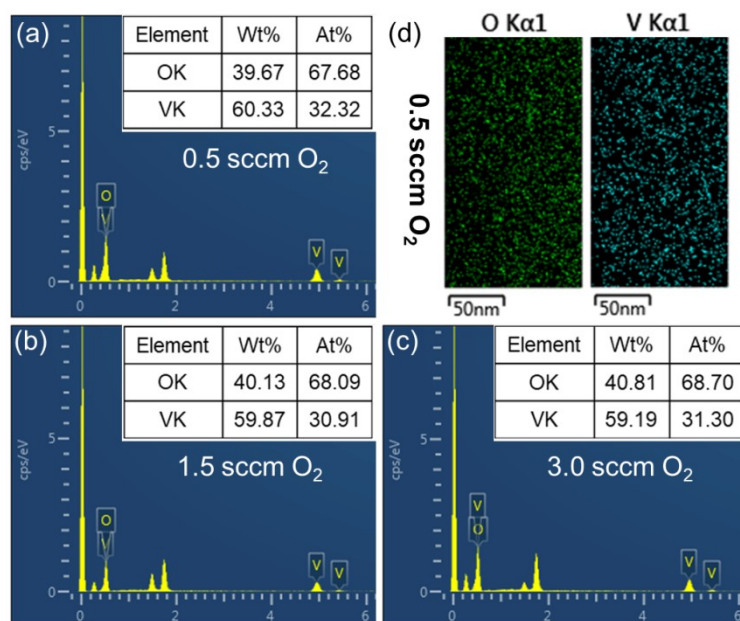

**Figure S3.** (a-c) EDS spectral lines of the VO<sub>2</sub> NBs grown at different oxygen levels. The insets showing the corresponding elemental composition of different NBs. (d) A typical elemental mapping of VO<sub>2</sub> NBs at 0.5 sccm O<sub>2</sub>.

We have also performed the growths of VO<sub>2</sub> NB on c-cut sapphire substrate at different stages, and the corresponding morphologies have been achieved using OM and SEM, as shown in Figure S4(a-d). The crystal morphology evolves from small particle/nuclei to ‘V’ shaped nanobeam with specific orientation as the increase of the growth temperature.

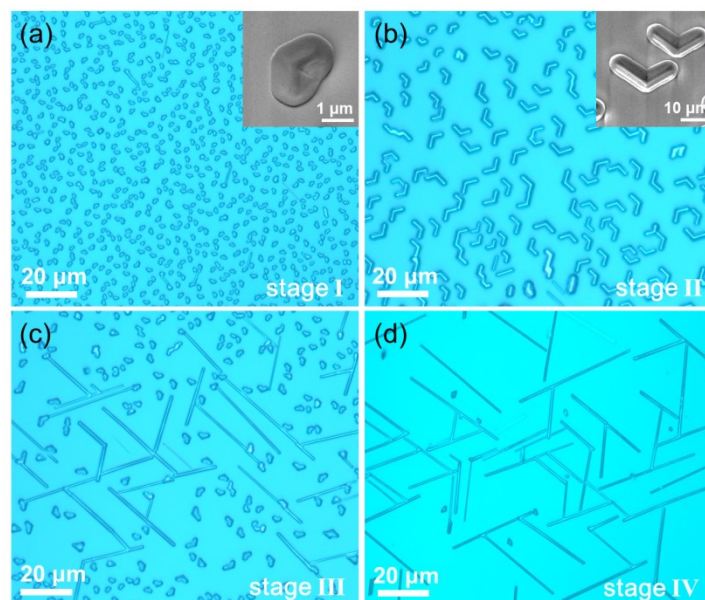

**Figure S4.** (a-d) Representative OM images of the growth products on c-cut sapphire substrate from the initial stage I to the final stage IV. The insets show the SEM magnified views corresponding to the OM images (a, b), respectively.

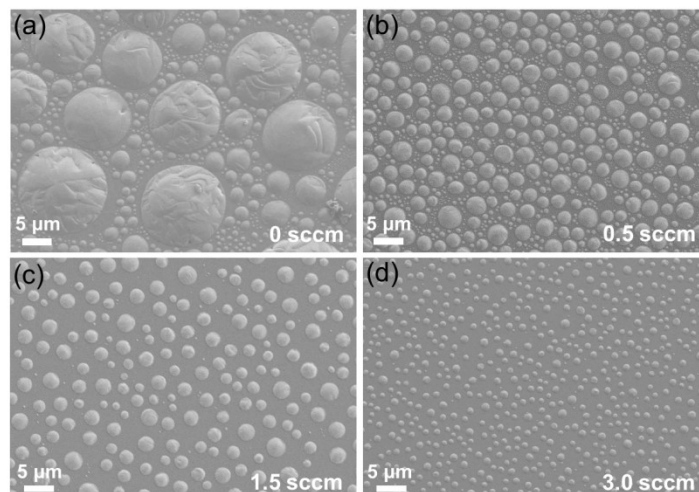

**Figure S5.** (a-d) SEM images of the  $V_2O_5$  droplets formed on  $SiO_2$  surface for the different  $O_2$  flows at stage I: 0, 0.5, 1.5 and 3.0 sccm, respectively. With the increase of oxygen content, the droplet size decreases significantly from  $\sim 10$  to  $\sim 0.8$   $\mu m$ .

The MIT and photoresponse measurements of  $VO_2$  NBs grown at 1.5 and 3.0 sccm  $O_2$  have also been conducted. Figure S6(a) shows the plots of temperature-dependent resistances of  $VO_2$  NBs grown at different oxygen levels. Although there are some discrepancies in the precise MIT temperature and its hysteresis, all NBs samples display substantial resistance variations with amplitudes up to 5 orders. Based on the aforementioned study, it is possible that the former in our case is primarily driven by the size variances between individual NBs or the sensitivity of MIT to non-uniform substrate adhesion and strain in such end-clamped NBs. Figure S6(b) depicts the relationship between photocurrent and power density for these  $VO_2$  NBs samples when exposed to a 532 nm laser, suggesting that there is no significance difference in the photoresponse characteristics of the devices based on various  $VO_2$  NBs.

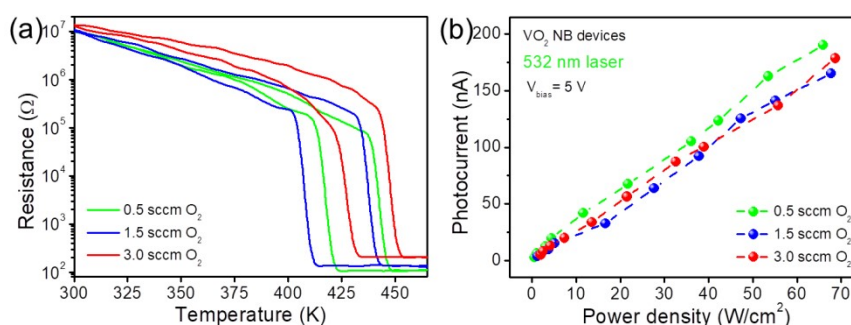

**Figure S6.** (a, b) Temperature dependent resistance curves and photocurrent versus light density plot of the  $VO_2$  NBs grown at different oxygen levels.

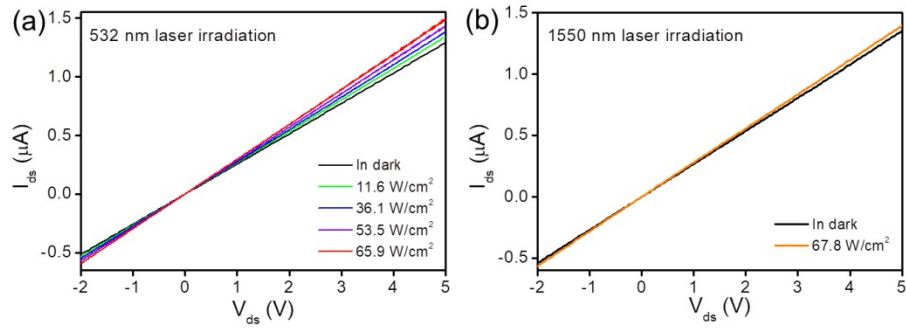

**Figure S7.** The current-voltage characteristic curves of the device under different wavelengths (532 and 1550 nm) and light intensities.

| stage I |                 | stage II/III |                 | stage III/II |                 | stage IV |                |
|---------|-----------------|--------------|-----------------|--------------|-----------------|----------|----------------|
| 145.0   | B <sub>1g</sub> | 144.9        | B <sub>1g</sub> | 144.0        | B <sub>1g</sub> |          |                |
| 194.1   | A <sub>g</sub>  | 195.6        | A <sub>g</sub>  | 191.5        | A <sub>g</sub>  | 191.2    | A <sub>g</sub> |
|         |                 | 224.9        | A <sub>g</sub>  | 221.3        | A <sub>g</sub>  | 221.3    | A <sub>g</sub> |
| 285.1   | B <sub>3g</sub> | 284.9        | B <sub>3g</sub> | 282.7        | B <sub>3g</sub> |          |                |
| 306.0   | A <sub>g</sub>  | 305.8        | A <sub>g</sub>  | 306.0        | A <sub>g</sub>  | 306.0    | A <sub>g</sub> |
|         |                 |              |                 | 337.9        | B <sub>g</sub>  | 337.9    | B <sub>g</sub> |
|         |                 |              |                 | 387.1        | A <sub>g</sub>  | 389.0    | A <sub>g</sub> |
| 405.3   | A <sub>g</sub>  | 401.9        | A <sub>g</sub>  |              |                 |          |                |
|         |                 | 615.8        | A <sub>g</sub>  | 615.6        | A <sub>g</sub>  | 612.1    | A <sub>g</sub> |
| 702.5   | B <sub>1g</sub> | 702.3        | B <sub>1g</sub> |              |                 |          |                |
| 993.9   | B <sub>2g</sub> | 993.7        | B <sub>2g</sub> |              |                 |          |                |

**Table S1.** Summary of the experimentally observed positions of the Raman-active modes of the growth products at different growth stages.

| Photodetector                                                                              | Laser (nm) | V <sub>bias</sub> (V) | R <sub>s</sub> (mA/W)    | Rise time (ms)       | Fall time (ms)       |
|--------------------------------------------------------------------------------------------|------------|-----------------------|--------------------------|----------------------|----------------------|
| VO <sub>2</sub> /Si heterostructure <sup>13</sup>                                          | 950        | 0                     | 2×10 <sup>-2</sup>       | 70                   | 150                  |
| VO <sub>2</sub> /GaAs heterostructure <sup>14</sup>                                        | 980        | 0                     | 2.5                      | 1.46                 | 1.90                 |
|                                                                                            | 1310       |                       | 4.8                      | 1.31                 | 1.58                 |
| VO <sub>2</sub> /Sb <sub>2</sub> Se <sub>3</sub> heterostructure <sup>15</sup>             | 520        | 0                     | 244                      | 0.2                  | 0.36                 |
| VO <sub>2</sub> /ZnO bilayer <sup>16</sup>                                                 | 365        | 1                     | 320                      | 2.49×10 <sup>3</sup> | 2.06×10 <sup>3</sup> |
| VO <sub>2</sub> thin films/Au <sup>17</sup>                                                | 808        | 1                     | 502.1                    | 138                  | 156                  |
|                                                                                            | 1550       | 10                    | 3.03                     | 1.8×10 <sup>2</sup>  | 4.7×10 <sup>3</sup>  |
|                                                                                            | 850        | 5                     | 16                       | 60                   | 85                   |
|                                                                                            | 1064       | 5                     | 40.09                    | 110                  | 160                  |
| VO <sub>2</sub> (M1) thin films <sup>18-23</sup>                                           | 1550       | 10                    | 7.13×10 <sup>-2</sup>    | 2.23×10 <sup>3</sup> | 3.67×10 <sup>3</sup> |
|                                                                                            | 1064       | 10                    | 1.54                     | 1.17×10 <sup>3</sup> | 1.08×10 <sup>3</sup> |
|                                                                                            | 650        | 10                    | ~353                     | 1.57                 | 1.64                 |
|                                                                                            | 980        |                       | ~78                      | 1.67                 | 4.12                 |
| VO <sub>2</sub> (B) nanosheet film <sup>24</sup>                                           | 405        | 0.2                   | 9.21×10 <sup>3</sup>     | 683                  | 338                  |
| VO <sub>2</sub> nanowire <sup>25</sup>                                                     | 365        | 5                     | -<br>(on/off ratio 719 ) | 1.3                  | 4.5                  |
| W-doped VO <sub>2</sub> nanowire <sup>26</sup>                                             | 532        | 4                     | 2.15×10 <sup>7</sup>     | 4.8                  | 3.9                  |
| W-doped VO <sub>2</sub> nanowire array <sup>27</sup>                                       | 980        | 3                     | 21.4                     | 228                  | 206                  |
| VO <sub>2</sub> (B) nanorods <sup>28</sup>                                                 | 980        | 2                     | -                        | 4.6×10 <sup>3</sup>  | 2.8×10 <sup>3</sup>  |
| VO <sub>2</sub> (M1) microwire <sup>29</sup>                                               | 360-400    | 4                     | 7069×10 <sup>3</sup>     | ~126                 | -                    |
| VO <sub>2</sub> (M1) nanorods <sup>30</sup>                                                | 980        | 2                     | -                        | 1.6×10 <sup>3</sup>  | 1.0×10 <sup>3</sup>  |
| VO <sub>2</sub> /V <sub>2</sub> O <sub>5</sub> core/shell NB heterostructure <sup>31</sup> | 990        | 3                     | 2873.7×10 <sup>3</sup>   | 50                   | 230                  |
| VO <sub>2</sub> NB <sup>32</sup>                                                           | 800        | 0.05                  | ~6×10 <sup>-3</sup>      | -                    | -                    |
| VO <sub>2</sub> (M1) NB (This work)                                                        | 532        | 5                     | 18                       | 2                    | 7                    |
|                                                                                            | 1550       |                       | 3                        | 41                   | 53                   |

**Table S2.** Comparison of the photoresponse characteristics of our VO<sub>2</sub> NBs photodetector with that of other VO<sub>2</sub> based photodetectors.
